# Supplementary material for: De novo AML exhibits greater microenvironment dysregulation compared to AML with myelodysplasia-related changes
Source: PubMed Central journal article supplement (PMC5234038; doi:10.1038/srep40707), 2017-01-13
Supplement: srep40707-s1.pdf [file srep40707-s1.pdf]

**De novo AML exhibits greater microenvironment dysregulation compared to AML with myelodysplasia-related changes**

Matheus Rodrigues Lopes<sup>1</sup>; João Kleber Novais Pereira<sup>1</sup>; Paula de Melo Campos<sup>1</sup>; João Agostinho Machado-Neto<sup>1</sup>; Fabiola Traina<sup>1,2</sup>; Sara T. Olalla Saad<sup>1</sup>; Patricia Favaro<sup>1,3,\*</sup>

\*corresponding author: favaropb@gmail.com, patricia.favaro@unifesp.br

**Supplementary Table 1.** Patients' characteristics.

| <b>Patients</b>              | <b>Number</b> |
|------------------------------|---------------|
| <b>MDS</b>                   | 22            |
| Male/Female                  | 16/06         |
| Age (yr), median (range)     | 71 (16-90)    |
| WHO classification           |               |
| RCUD/RCMD/RARS               | 01/11/04      |
| RAEB-1/RAEB-2                | 02/04         |
| <b>AML</b>                   | 19            |
| Male/Female                  | 08/11         |
| Age (yr), median (range)     | 64 (30-86)    |
| AML with MDS-related changes | 07            |
| <i>de novo</i> AML           | 12            |

HC, healthy controls; MDS, myelodysplastic syndrome; AML, acute myeloid leukemia; RCMD, refractory cytopenia with multilineage dysplasia; RARS, refractory anemia with ring sideroblasts; RAEB-1/2, refractory anemia with excess blasts-1/2.

**Supplementary Table 2.** Pattern of markers differentially expressed on MSCs. Percentage of positive cells (mean  $\pm$ SD).

| <b>CD marker</b> | <b>HC</b>          | <b>MDS</b>         | <b>AML-MRC</b>     | <b><i>de novo</i> AML</b> |
|------------------|--------------------|--------------------|--------------------|---------------------------|
| <b>CD90</b>      | 98.3 ( $\pm$ 2.3)  | 97.6 ( $\pm$ 4.0)  | 99.3 ( $\pm$ 0.8)  | 94.8 ( $\pm$ 4.4)         |
| <b>CD105</b>     | 94.1 ( $\pm$ 5.8)  | 94.8 ( $\pm$ 5.2)  | 97.1 ( $\pm$ 4.3)  | 93.0 ( $\pm$ 7.2)         |
| <b>CD73</b>      | 87.7 ( $\pm$ 11.5) | 86.8 ( $\pm$ 16.5) | 94.3 ( $\pm$ 6.5)  | 76.3 ( $\pm$ 26.3)        |
| <b>HLA DR</b>    | 1.3 ( $\pm$ 0.7)   | 1.4 ( $\pm$ 0.8)   | 3.0 ( $\pm$ 1.4)   | 2.8 ( $\pm$ 1.7)          |
| <b>CD34</b>      | 3.9 ( $\pm$ 2.6)   | 6.2 ( $\pm$ 5.7)   | 13.0 ( $\pm$ 9.7)  | 2.8 ( $\pm$ 2.5)          |
| <b>CD45</b>      | 1.2 ( $\pm$ 0.4)   | 1.6 ( $\pm$ 1.8)   | 2.0 ( $\pm$ 0.9)   | 2.8 ( $\pm$ 1.9)          |
| <b>CD31</b>      | 1.8 ( $\pm$ 1.3)   | 2.1 ( $\pm$ 1.4)   | 10.3 ( $\pm$ 15.8) | 2.1 ( $\pm$ 1.4)          |

HC. healthy control; MDS. myelodysplastic syndrome; AML. acute myeloid leukemia; AML-MRC. AML with MDS-related changes. Mann Whitney test.

**Supplementary Table 3.** Sequence and concentration of primers used for qPCR.

| Gene          | Foward primer             | Reverse primer            | Concentration |
|---------------|---------------------------|---------------------------|---------------|
| IL32          | GAACTTTTGGCCGCCATGT       | GGCCTTCAGCTTCTTCATGT      | 150 nM        |
| IL32 $\alpha$ | GACAGTGGCGGCTTATTATGAG    | GCTCCGTAGGACTTGTCACAAA    | 150 nM        |
| IL32 $\beta$  | CTGTCTCTCTCGGCTGAGTATTTGT | TCTTCATGTCATCAGAGAGGACCTT | 300 nM        |
| IL32 $\gamma$ | GTAATGCTCCTCCCTACTTC      | GCAAAGGTGGTGTCAGTATC      | 300 nM        |
| IL32 $\delta$ | GACGTGGACAGGACGACTTCA     | CCTCGGCACCGTAATCCAT       | 150 nM        |
| VEGFA         | AGCCTTGCCGCCTTGCTGCTCTA   | GTGCTGGCCTTGGTGAGG        | 300 nM        |
| CXCL12        | GAGCTACAGATGCCCATGC       | CTTTAGCTTCGGGTCAATGC      | 150 nM        |
| IDO           | TTGGAGAAAGCCCTTCAAGTG     | TGCCTTTCCAGCCAGACAA       | 300 nM        |
| RPGE2         | CCCCCAGTATTGCAGGAG        | TAGACGAAGCCCAGGAAAAG      | 150 nM        |
| IL10          | GCTGAGAACCAAGACCCAGA      | AAATCGATGACAGCGCCGT       | 300 nM        |
| TGF $\beta$ 1 | GCGTGCTAATGGTGGAAACC      | GCTTCTCGGAGCTCTGATGTG     | 150 nM        |
| IL1 $\beta$   | CTTTGAAGCTGATGGCCCTAAA    | AGTGGTGGTTCGGAGATTCGT     | 300 nM        |
| IL6           | GGTACATCCTCGACGGCATCT     | GTGCCTCTTTGCTGCTTTCAC     | 150 nM        |
| HPRT          | GAACGTCTTGCTCGAGATGTGA    | TCCAGCAGGTTCAGCAAAGAAT    | 150 nM        |

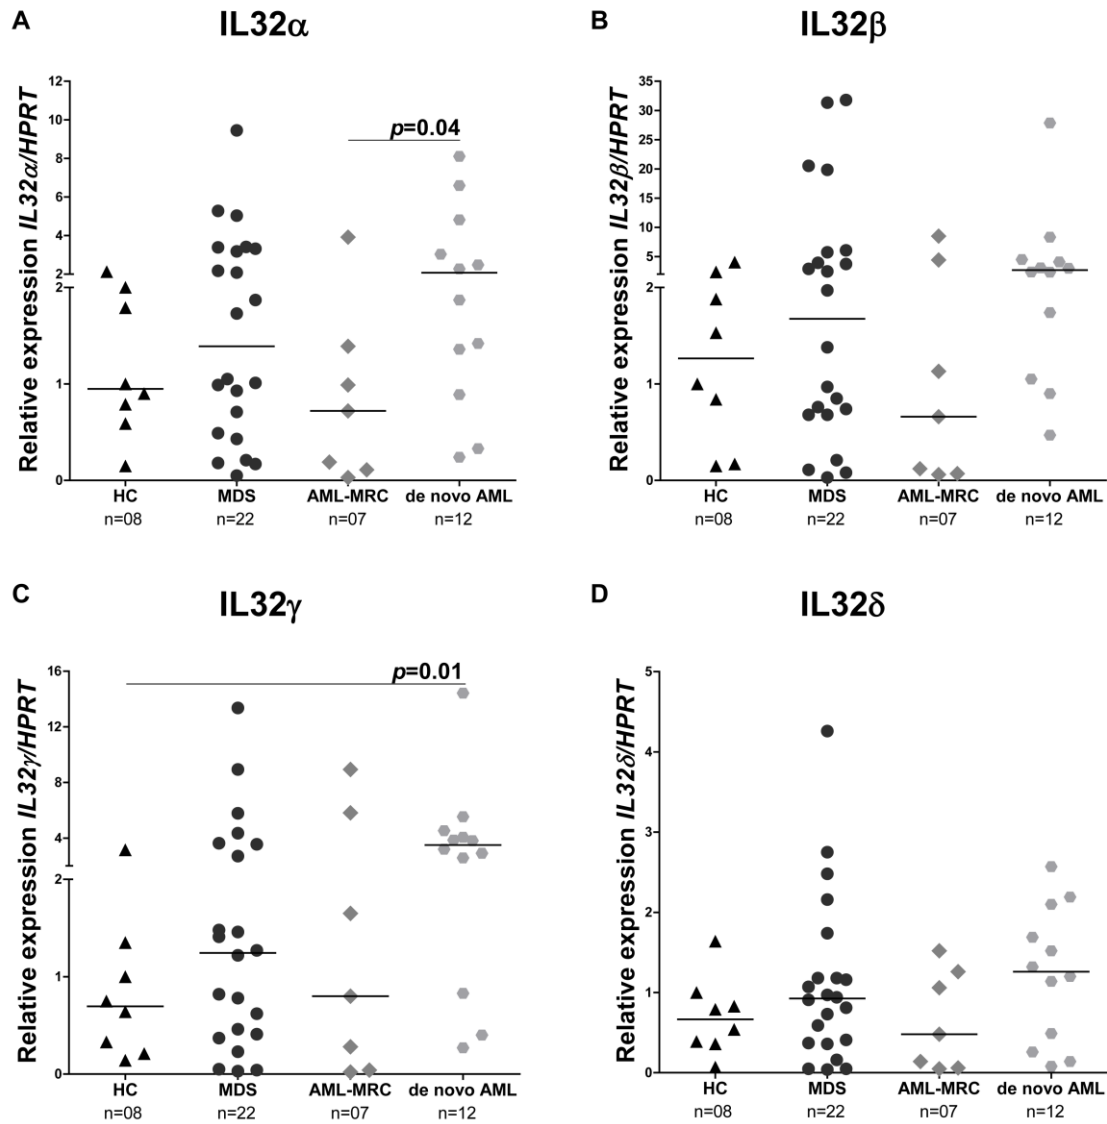

**SUPPLEMENTARY FIGURE S1. Expression of isoforms of IL32.** qPCR analyses of mRNA expression of *IL32 $\alpha$*  (A), *IL32 $\beta$*  (B), *IL32 $\gamma$*  (C), and *IL32 $\delta$*  (D), in bone marrow MSCs obtained from HC, MDS, AML-MRC and *de novo* AML patients. The "y" axis represents the relative mRNA expression. Horizontal lines indicate medians. The number of samples in each group and *p* values are indicated in the graph. Mann Whitney test.

*SUPPLEMENTARY INFORMATION*

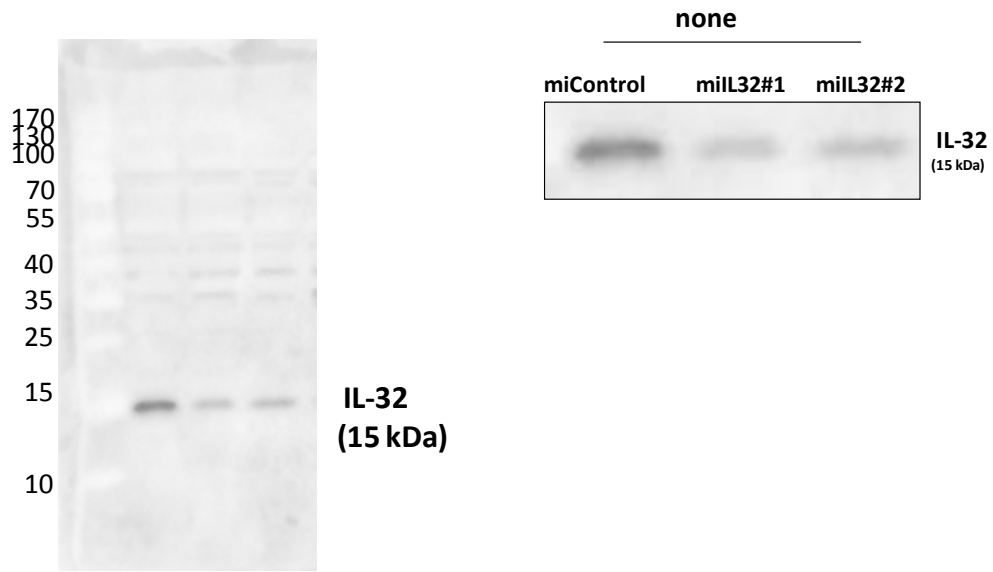

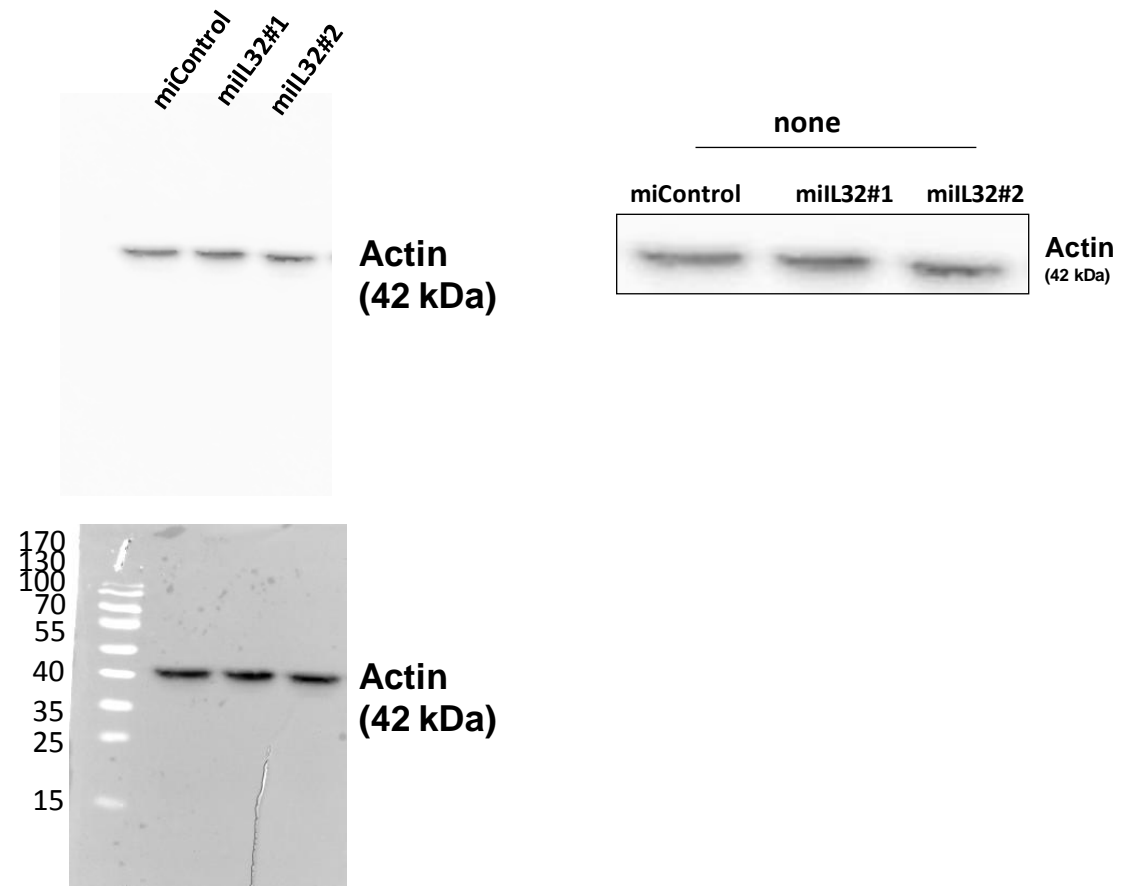

SUPPLEMENTARY FIGURE S2

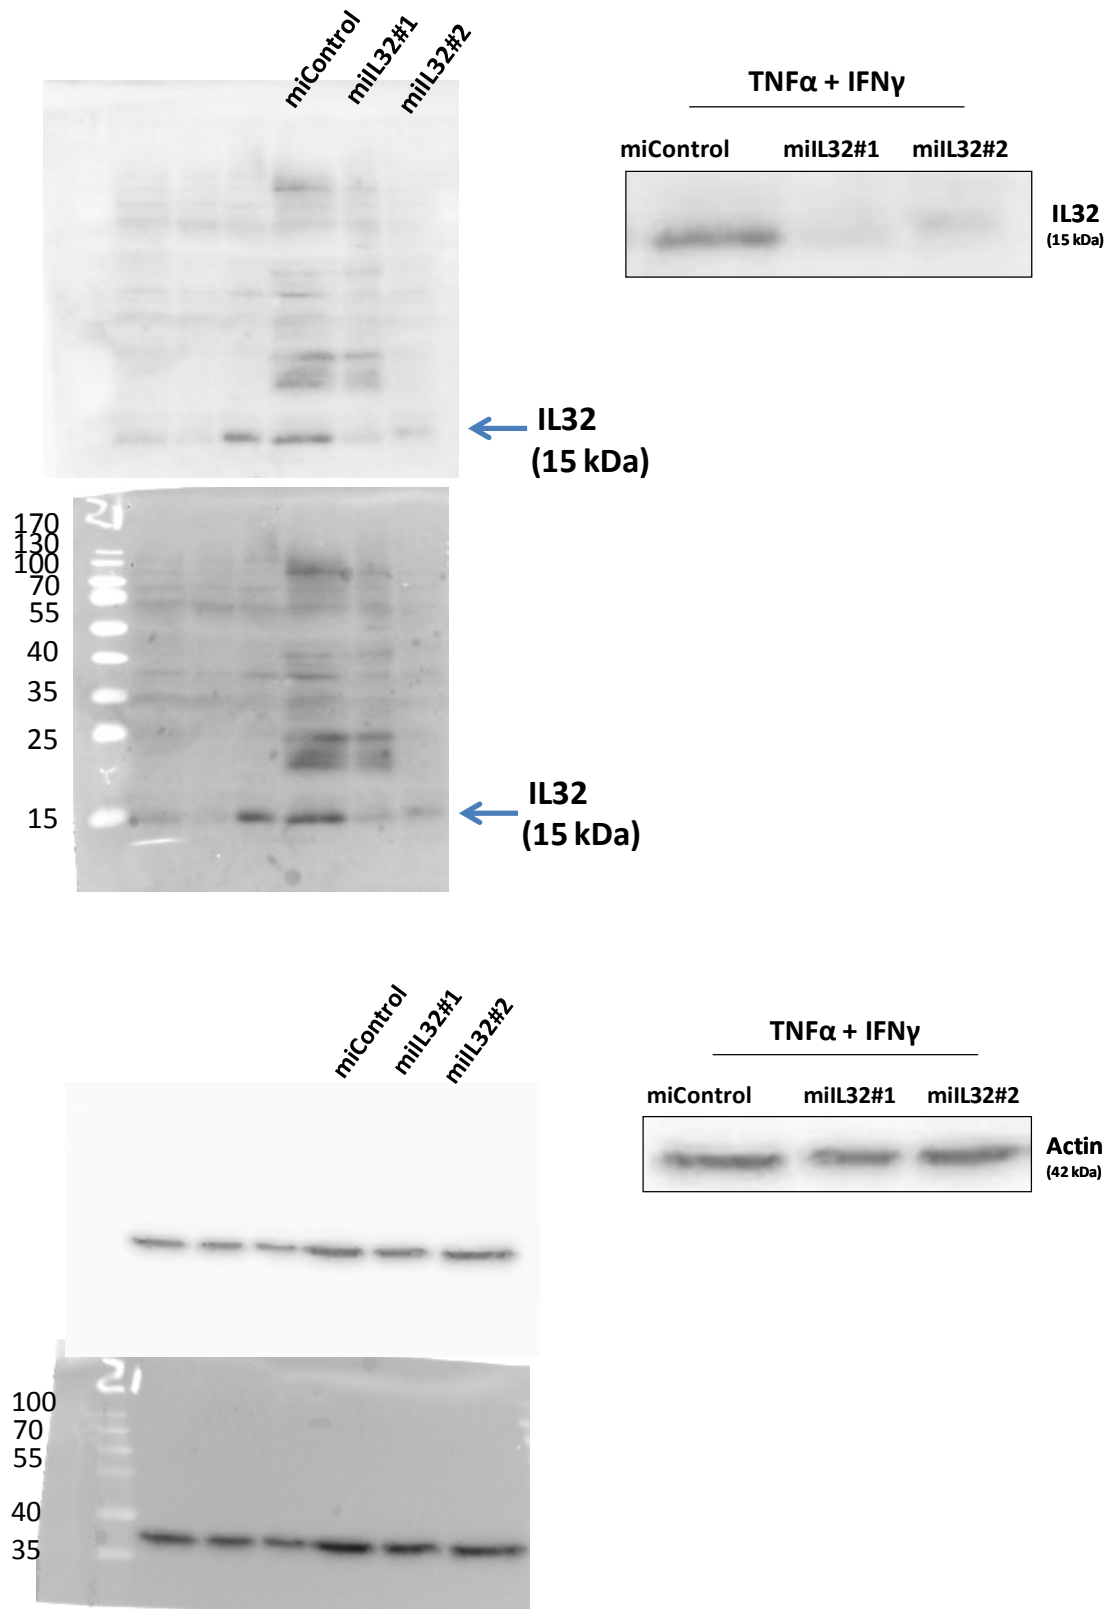

SUPPLEMENTARY FIGURE S2

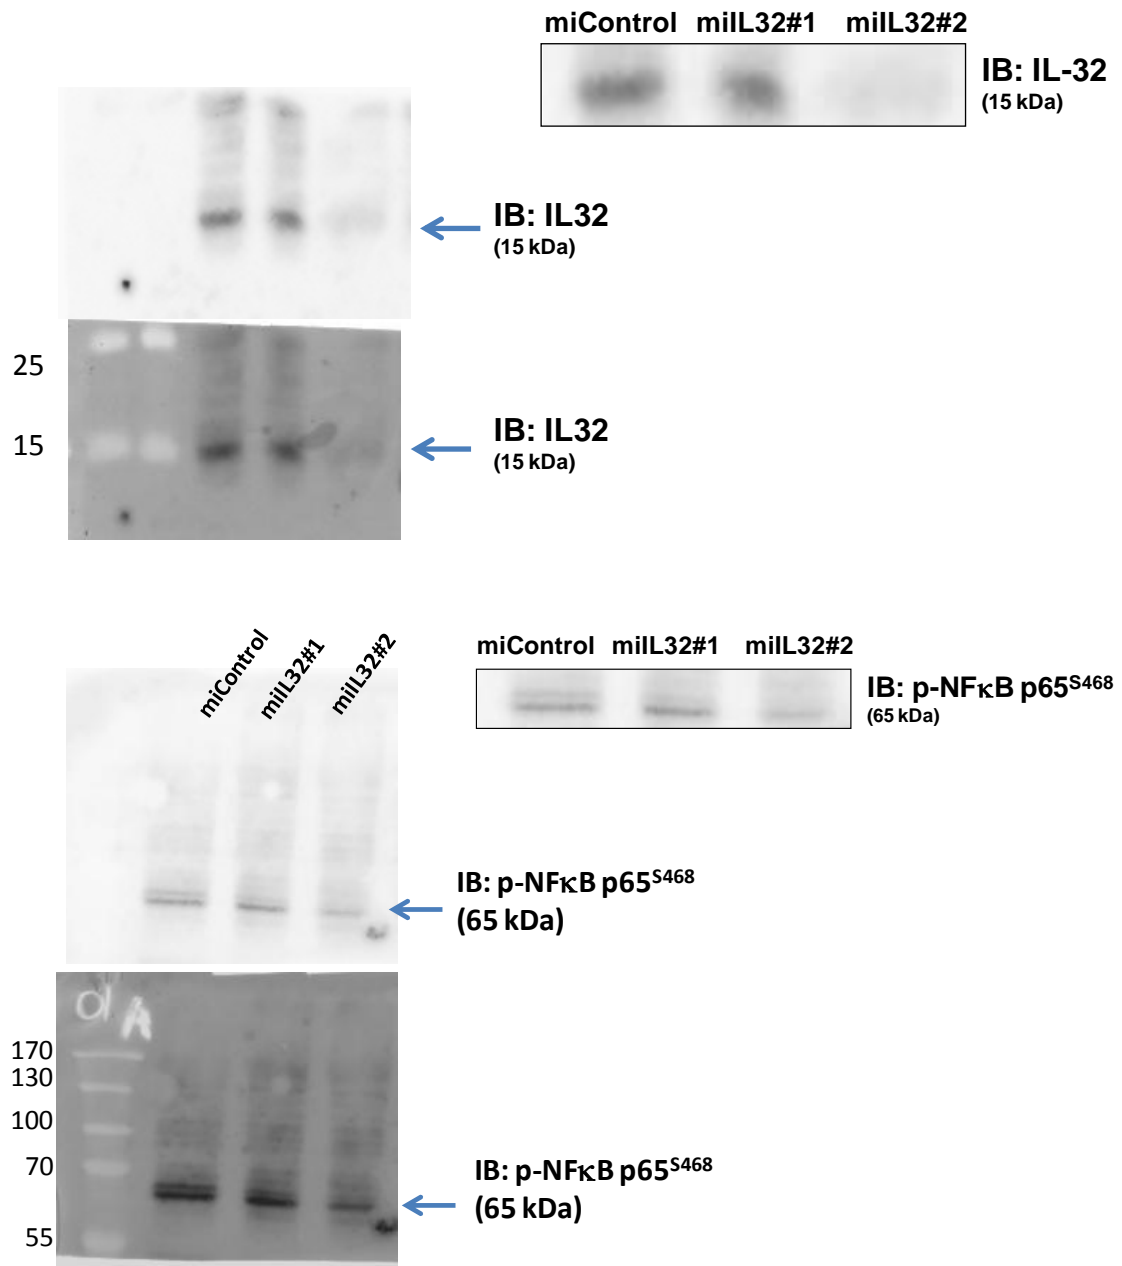

SUPPLEMENTARY FIGURE S3



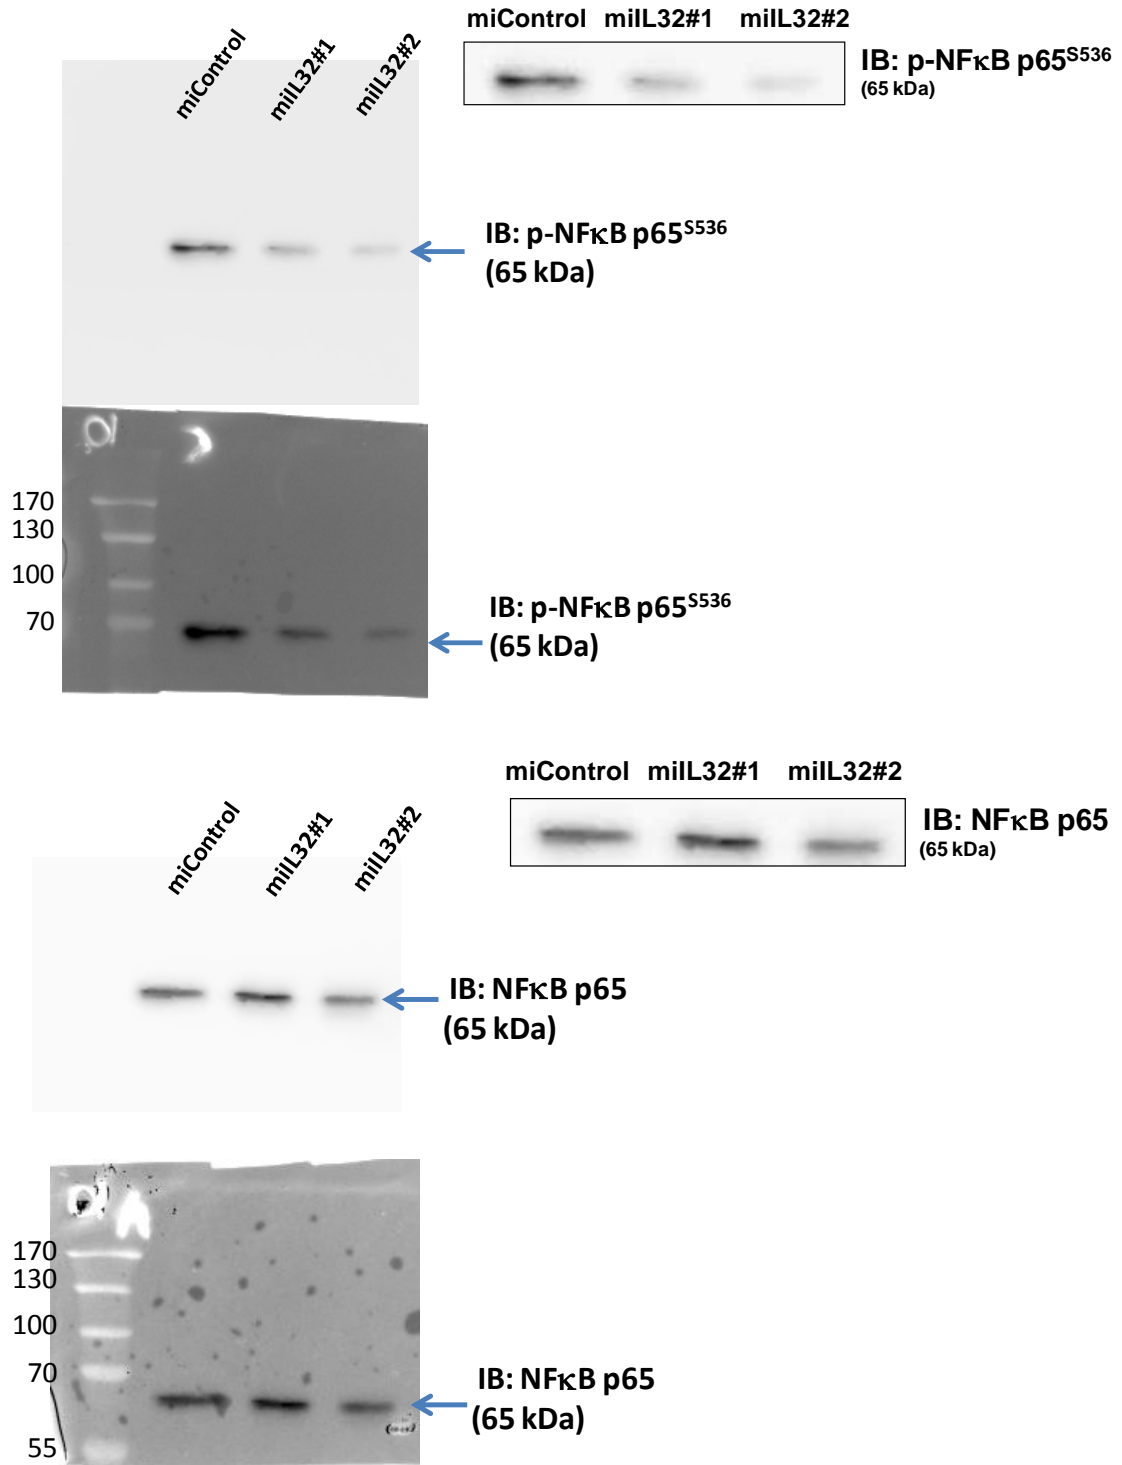

SUPPLEMENTARY FIGURE S3

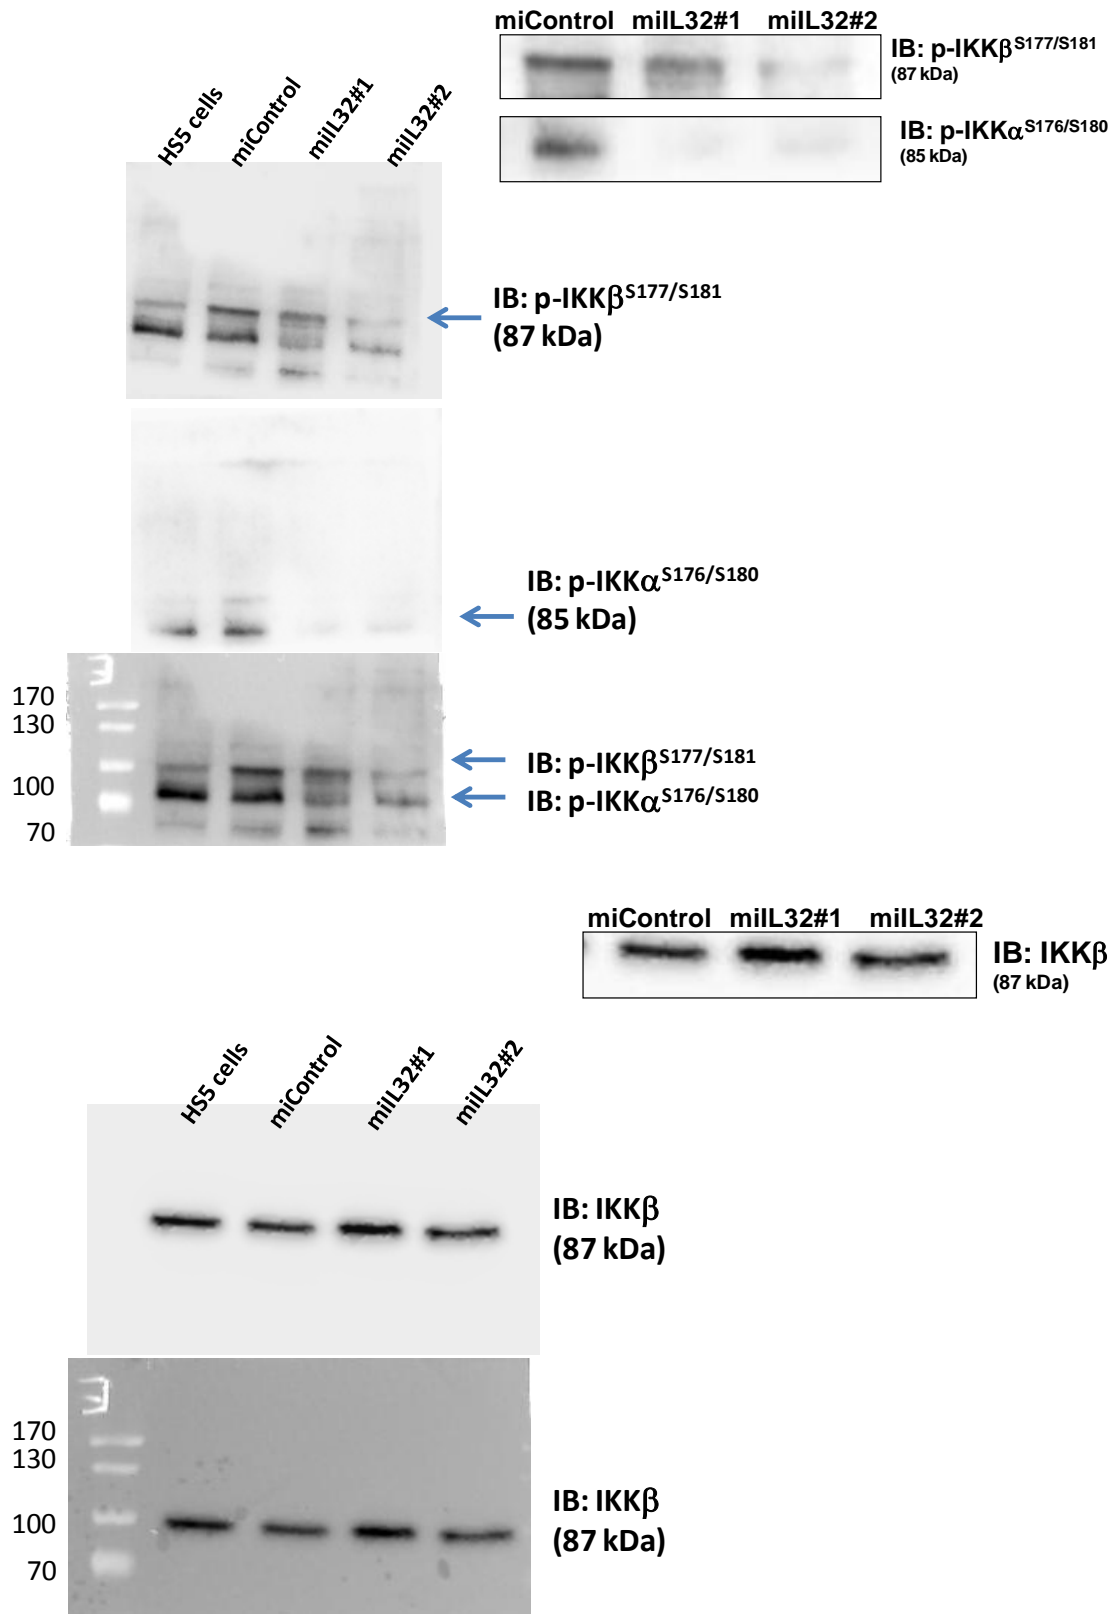

SUPPLEMENTARY FIGURE S3

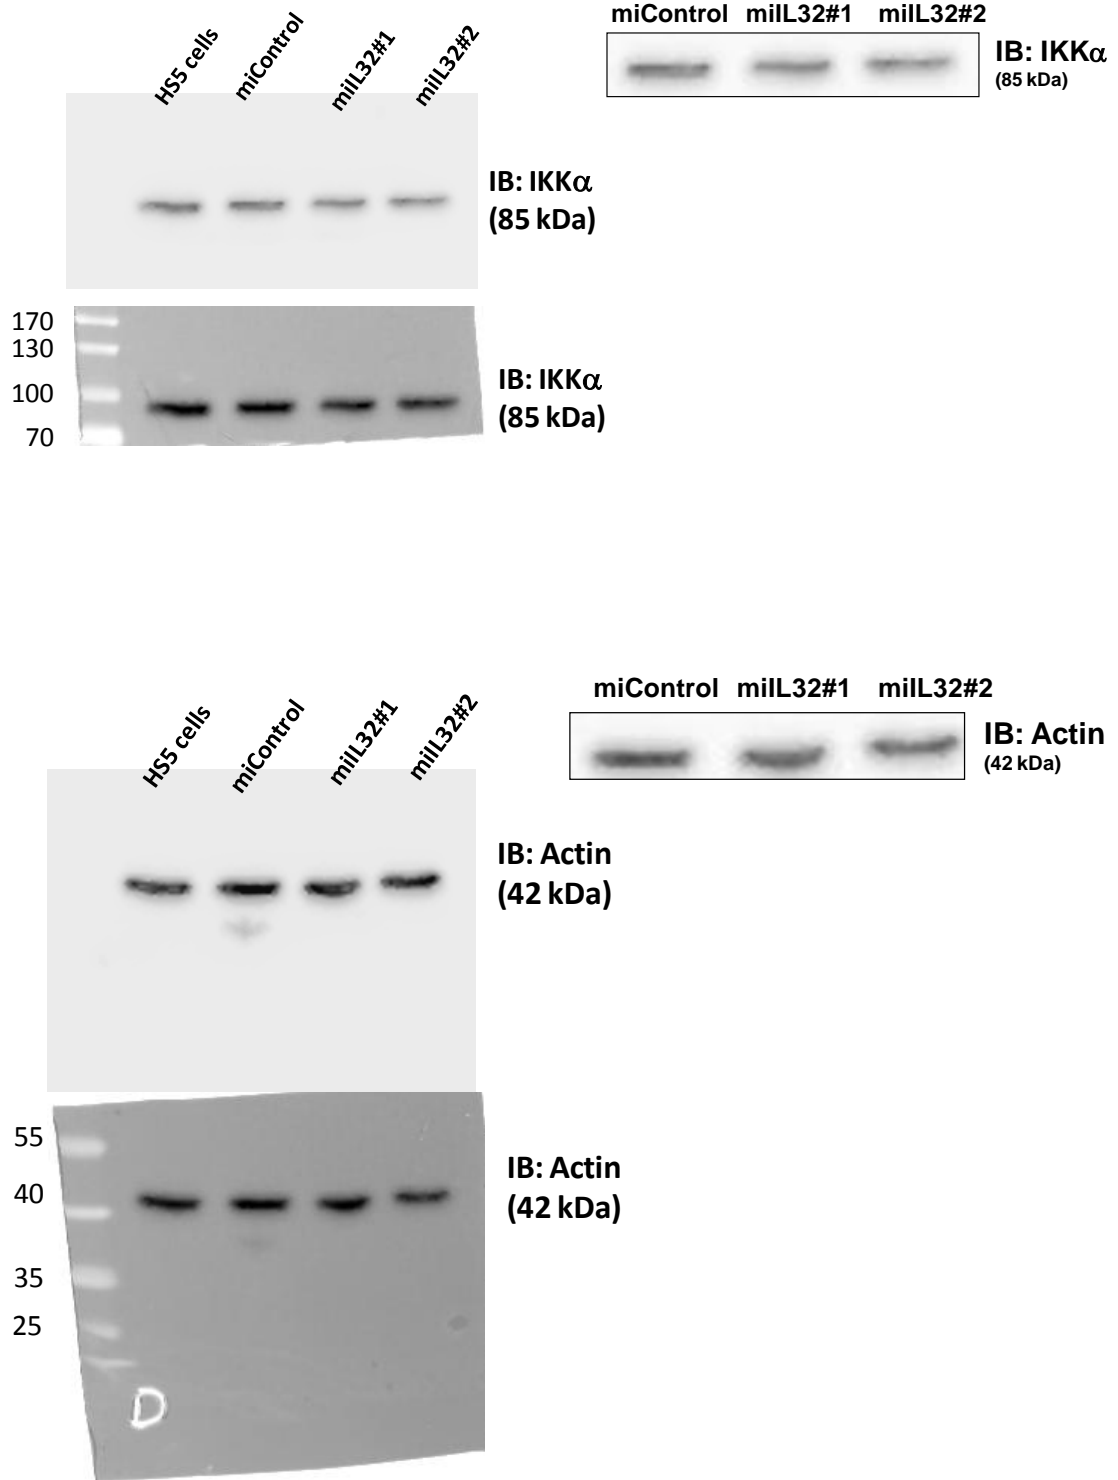

SUPPLEMENTARY FIGURE S3

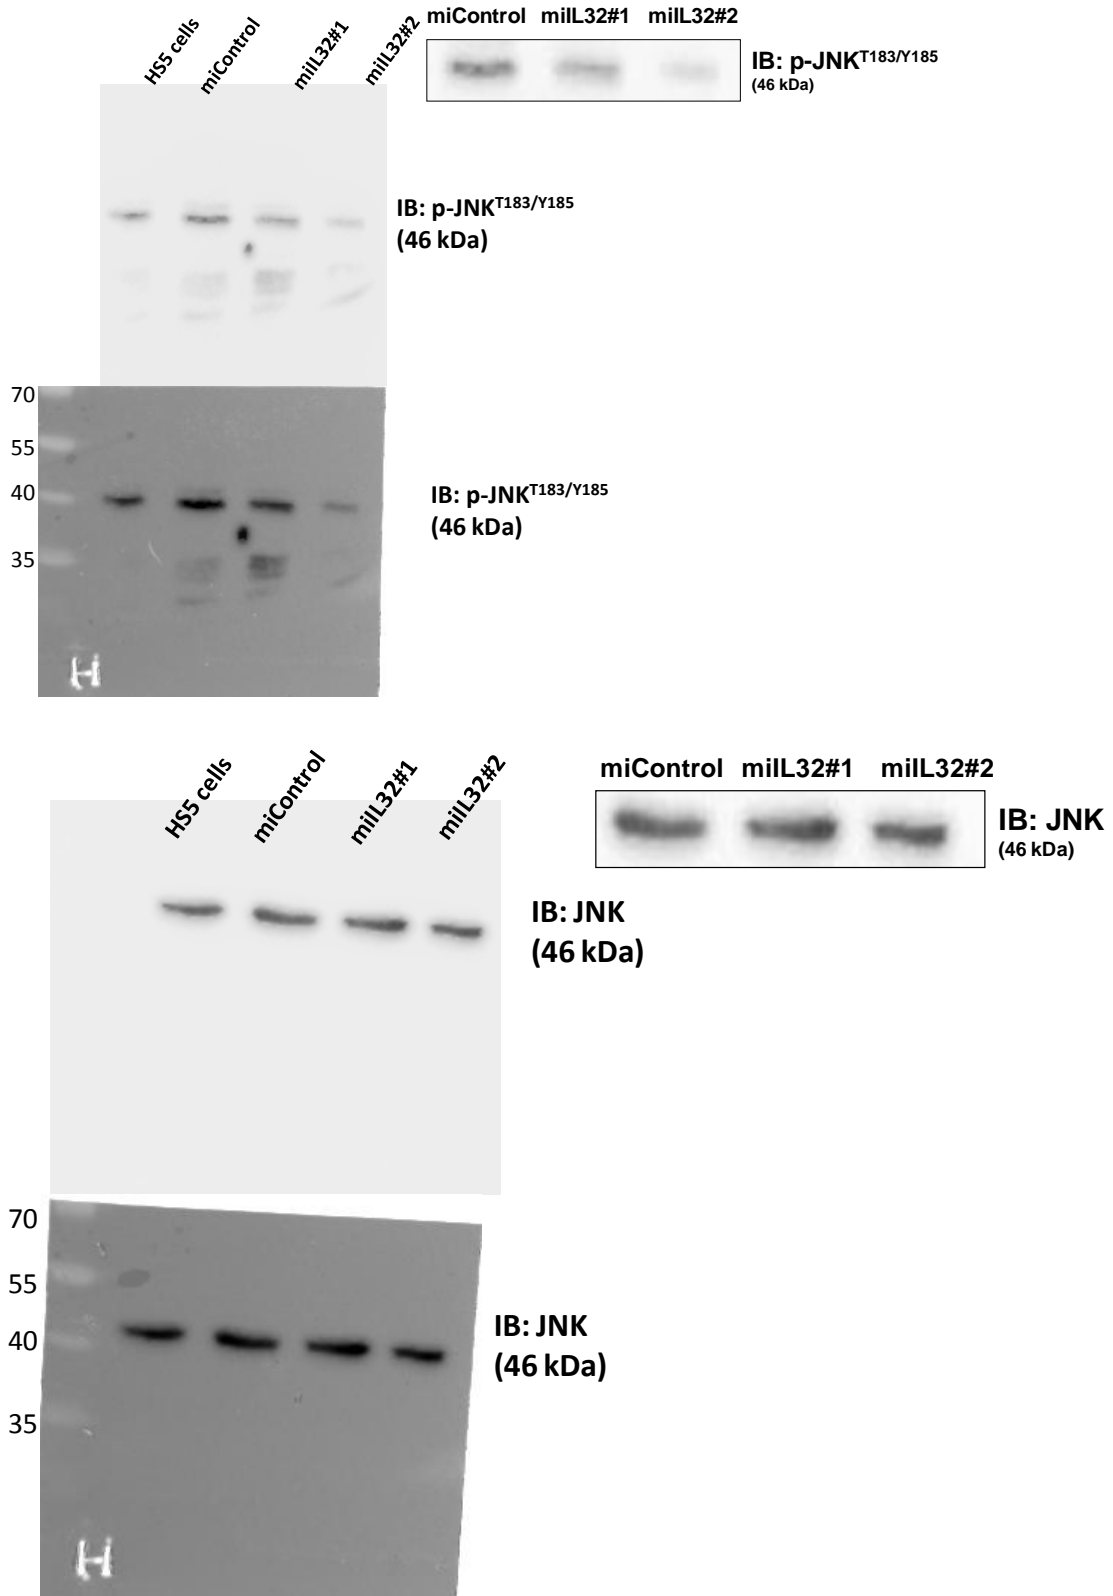

SUPPLEMENTARY FIGURE S3

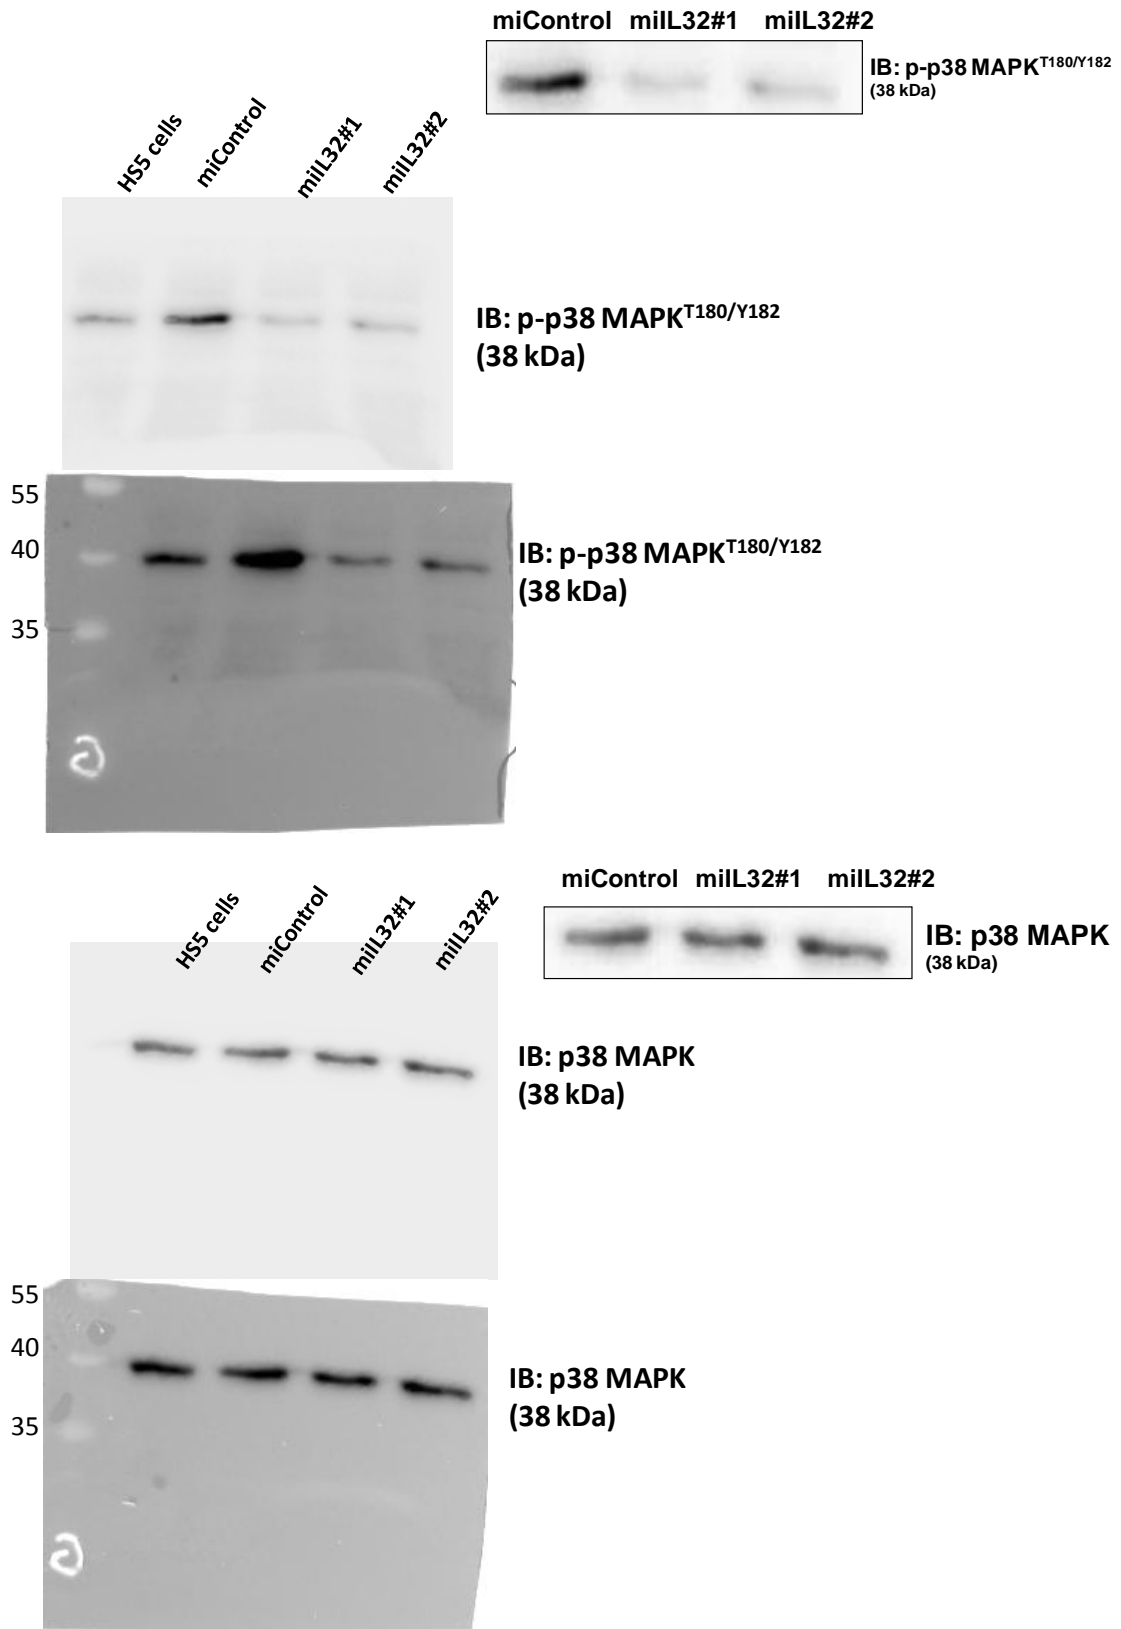

SUPPLEMENTARY FIGURE S3

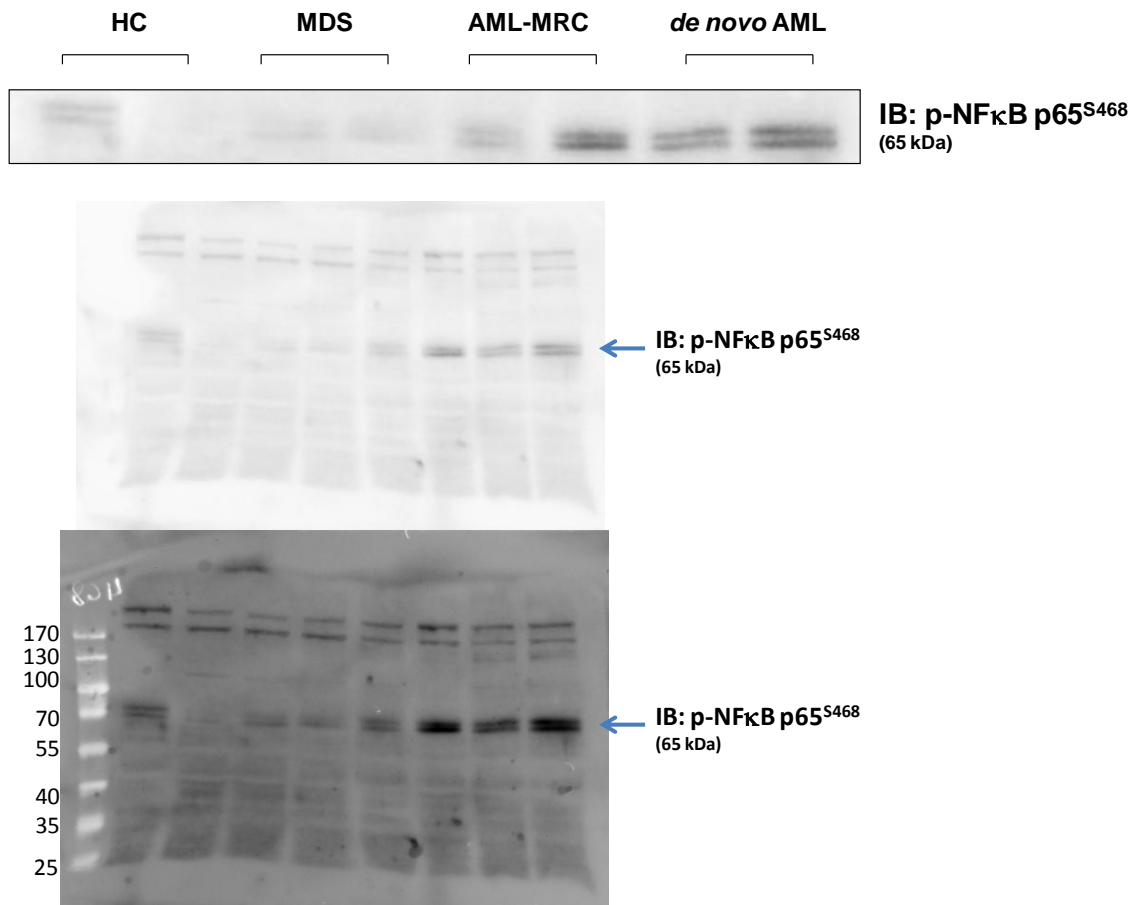

SUPPLEMENTARY FIGURE S3

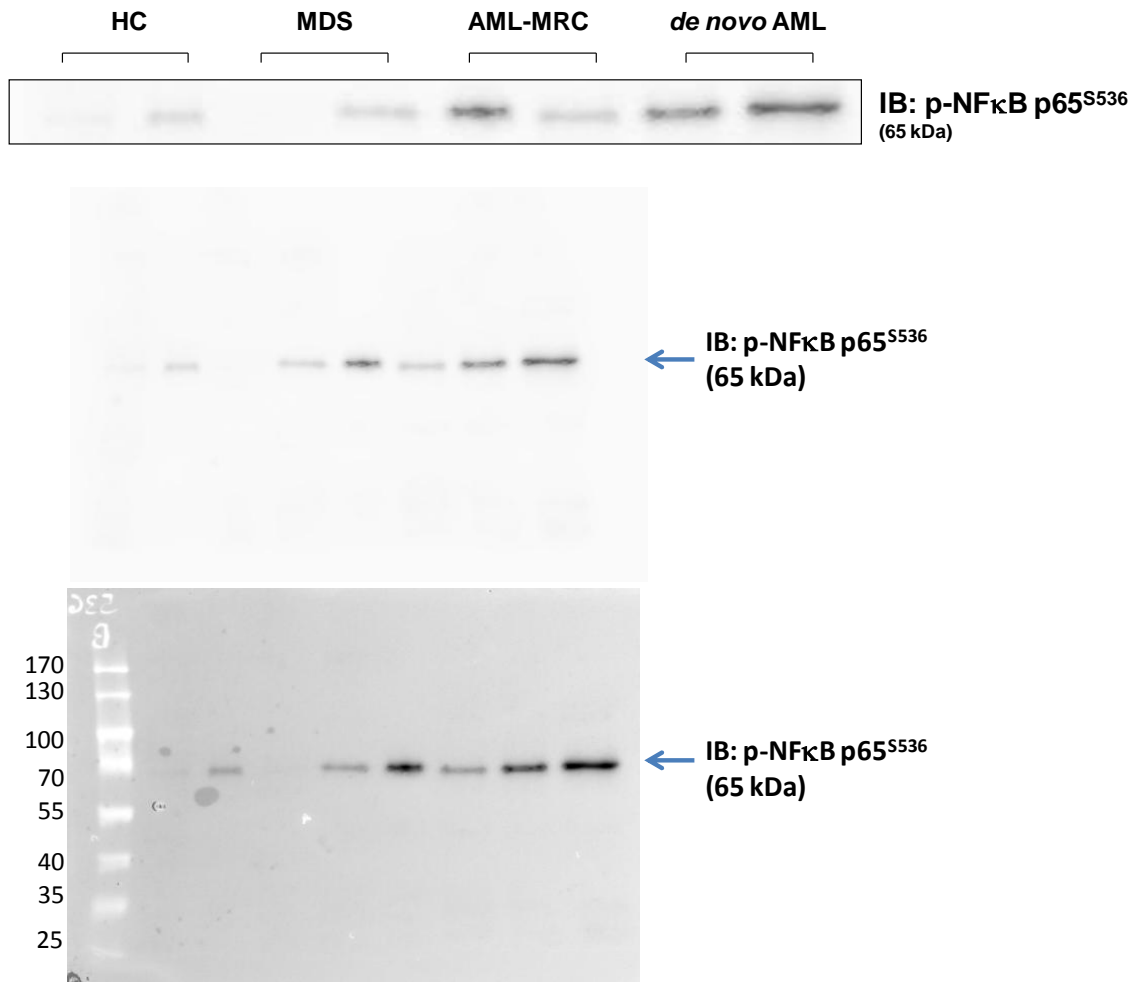

SUPPLEMENTARY FIGURE S3

SUPPLEMENTARY INFORMATION

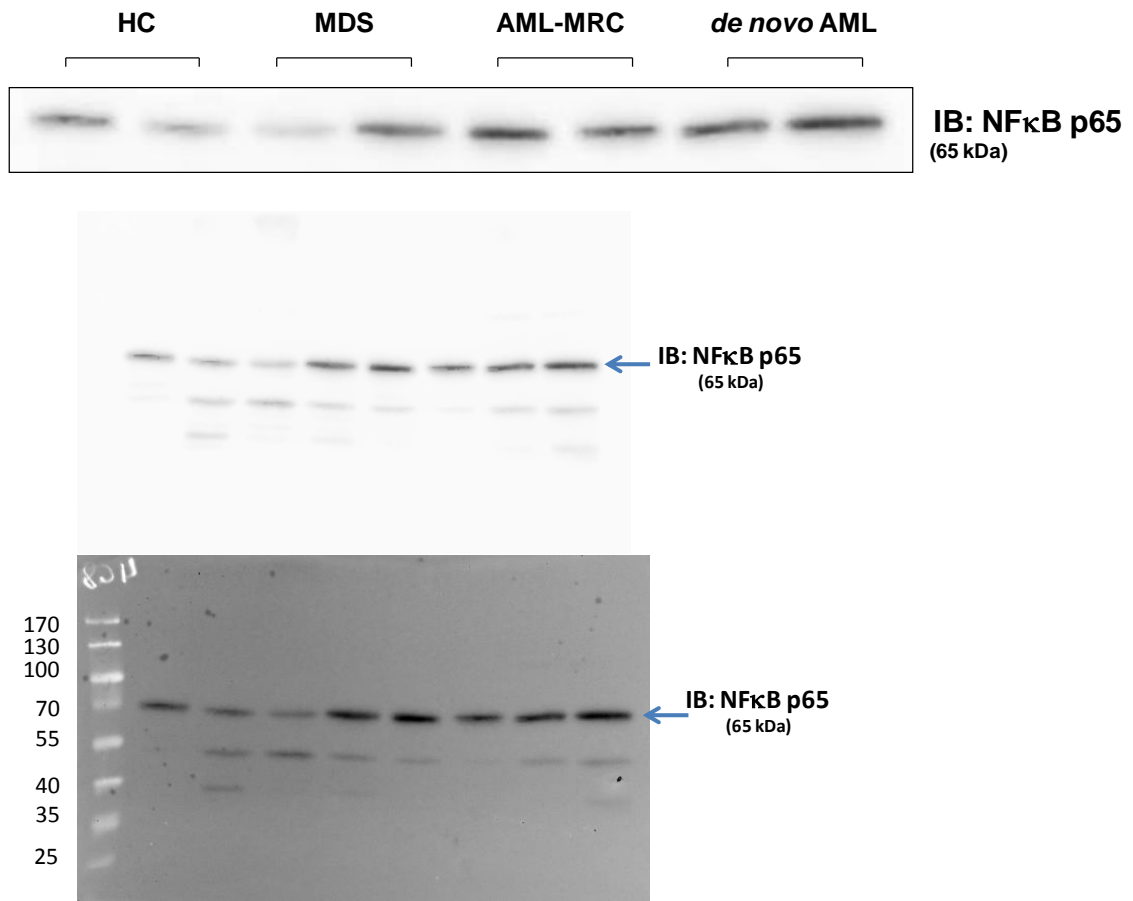

SUPPLEMENTARY FIGURE S3



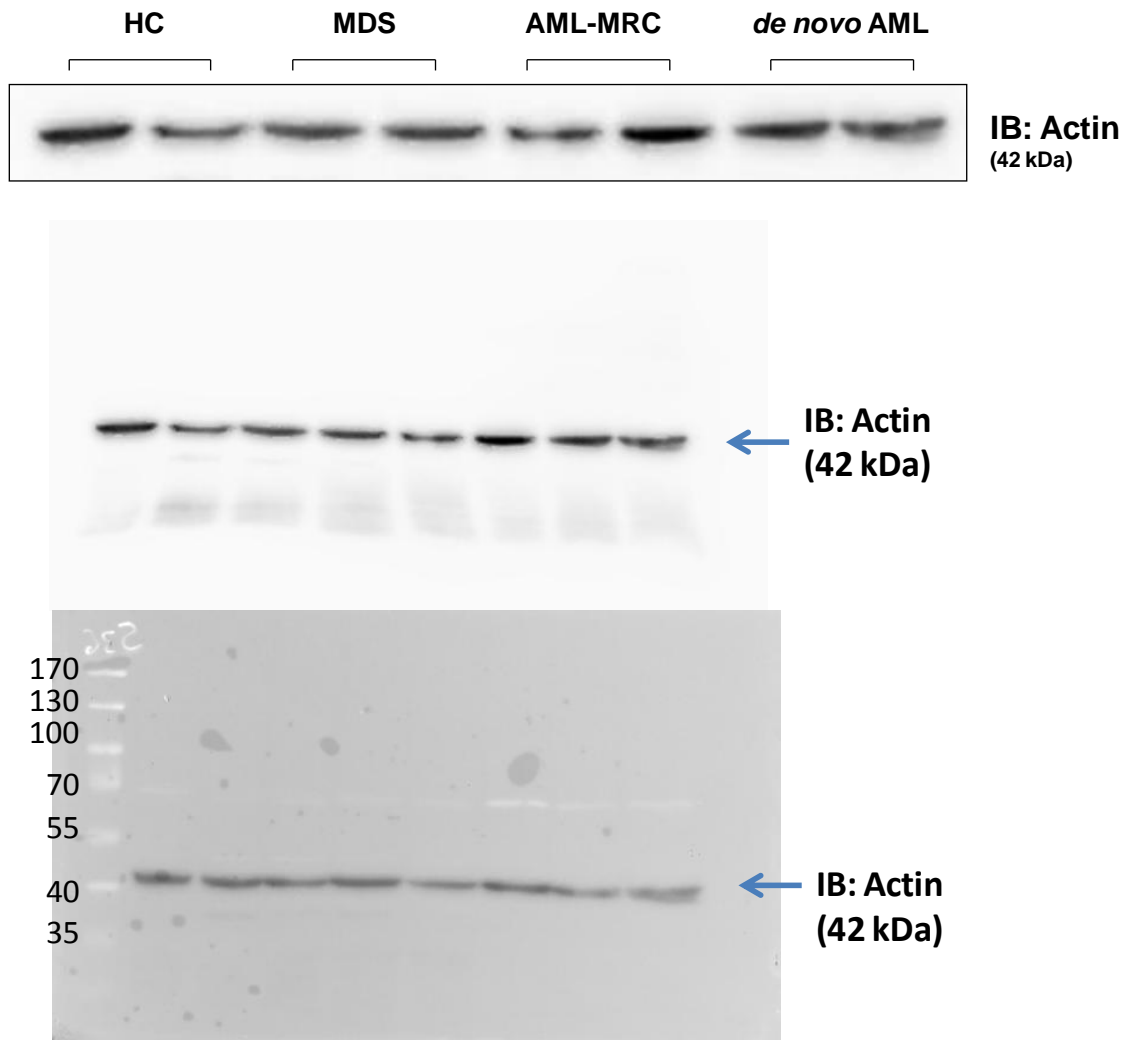

SUPPLEMENTARY FIGURE S3
